# Supplementary material for: Identifying in silico how microstructural changes in cellular fruit affect the drying kinetics
Source: Royal Society of Chemistry journal article supplement (doi:10.1039/d0sm00749h), 2020-01-01
Supplement: d0sm00749h2.pdf [file d0sm00749h2.pdf]

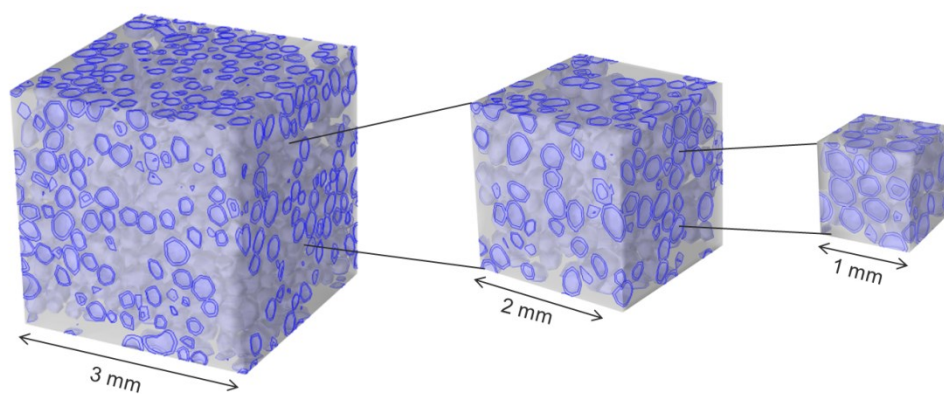

Figure A. Tissue sample used for determining the Representative Elementary Volume (REV). A cubical tissue with an edge length of 3 mm was divided into smaller tissue (2 mm, 1 mm and 0.5 mm). The protoplast and cell wall domains are highlighted in blue.
