# Supplementary material for: Identifying in silico how microstructural changes in cellular fruit affect the drying kinetics
Source: Royal Society of Chemistry journal article supplement (doi:10.1039/d0sm00749h), 2020-01-01
Supplement: d0sm00749h3.pdf [file d0sm00749h3.pdf]

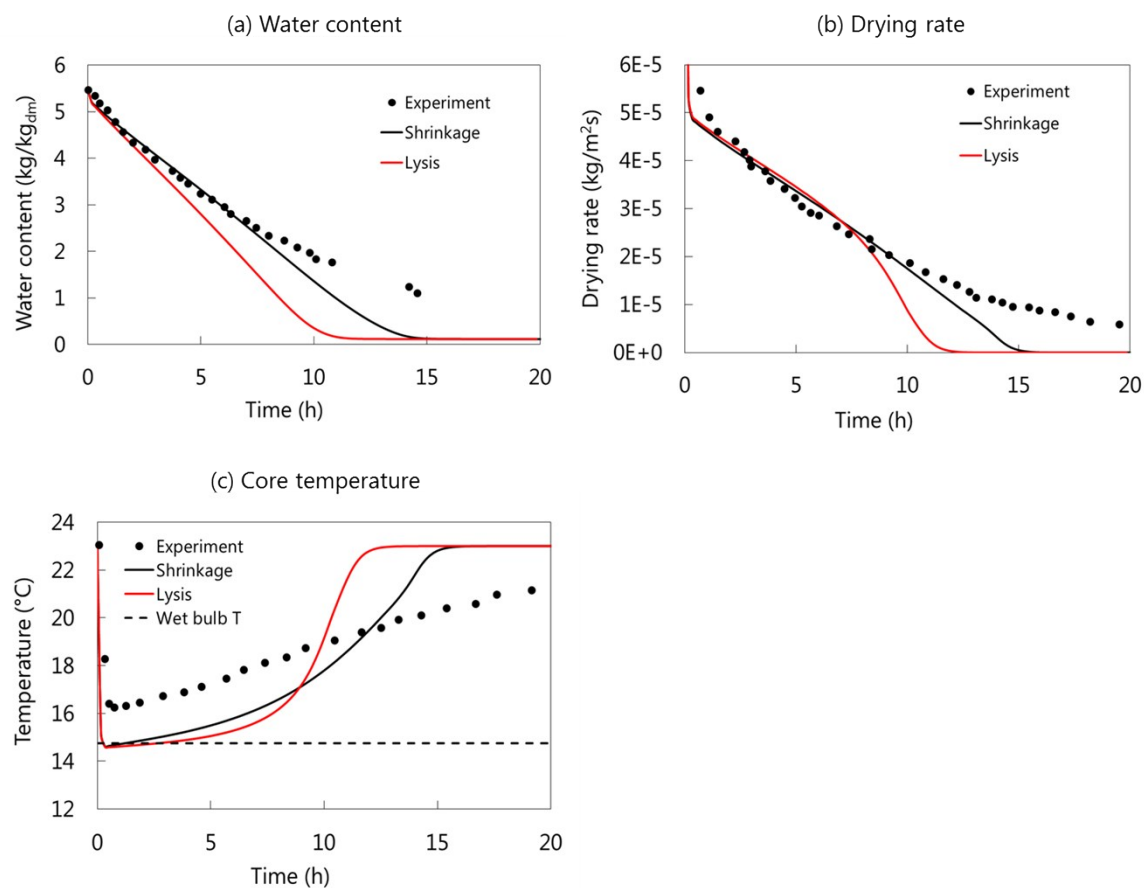

**Figure B.** Comparison between the macroscale simulation and experimental results of (Defraeye and Verboven, 2016): (a) water content, (b) drying rate and (c) core temperature. Two dehydration cases are considered in the simulations, namely free shrinkage and total lysis.
